# Supplementary material
Source: publisher figshare collection journal article supplement (https://karger.figshare.com/ndownloader/files/35983493)
Supplement: Supplementary file 1 [file 35983493]

| ***Medline Search*** |
| --- |
| Filters: newborn: birth – 1 month. Language: English, French, German and Spanish. |
| (“Kangaroo-Mother Care Method” [MesH] OR kangaroo mother care [tiab] OR kangaroo care [tiab] OR skin-to-skin contact [tiab] OR skin to skin care [tiab])  AND  (“oxygen” [MesH] OR “vital signs” [MesH] OR “heart rate” [MesH] OR “respiratory rate” [MesH] OR “brain” [MesH] OR cerebral perfusion [tiab] OR cerebral saturation [tiab] OR cerebral hemodynamic* [tiab] OR brain hemodynamic* [tiab] OR oxygen saturation [tiab] OR cardiorespiratory stability [tiab] OR hemodynamic monitoring [tiab] OR physiological stability [tiab])  AND  (“infant, premature”[MesH] OR “infant, low birth weight” [MesH] OR “infant, extremely premature” [MesH] OR premature infant [tiab] OR neonate [tiab] OR infant [tiab] OR newborn [tiab] OR preterm [tiab] OR neonat*[tiab]) |
| ***Embase Search*** |
| Filters: newborn: birth – 1 month. Language: English, French, German and Spanish. |
| (Kangaroo-mother care method:ab,ti OR kangaroo mother care:ab,ti OR kangaroo care:ab,ti OR skin-to-skin contact:ab,ti OR skin to skin care:ab,ti)  AND  (oxygen:ab,ti OR vital signs:ab,ti OR heart rate:ab,ti OR respiratory rate:ab,ti OR brain:ab,ti OR cerebral perfusion:ab,ti OR cerebral saturation:ab,ti OR cerebral hemodynamic:ab,ti OR brain hemodynamic:ab,ti OR oxygen saturation:ab,ti OR cardiorrespiratory stability:ab,ti OR hemodynamic monitoring:ab,ti OR physiological stability:ab,ti)  AND  (premature infant:ab,ti OR low birth weight/exp OR neonate:ab,ti OR infant:ab,ti OR preterm:ab,ti OR prematurity/exp OR newborn ) |
| ***CINAHL Search*** |
| Filters: newborn: birth – 1 month. Language: English, French, German and Spanish. |
| (Kangaroo-mother care method (AB) OR kangaroo mother care (AB) OR kangaroo care (AB) OR skin-to-skin contact (AB) OR skin to skin care (AB))  AND  (oxygen (AB) OR vital signs (AB) OR heart rate (AB) OR respiratory rate (AB) OR brain (AB) OR cerebral perfusion (AB) OR cerebral saturation (AB) OR cerebral OR oxygen saturation (AB) OR cardiorrespiratory stability(AB) OR hemodynamic monitoring (AB) OR physiological stability(AB))  AND  (“infant, premature” (AB) OR “infant, low birth weight” (AB) OR “infant, extremely premature” (AB) OR neonate (AB) OR infant (AB) OR newborn (AB)) |
| **SCOPUS Search** |
| Filters: Language: English, French, German and Spanish. |
| TITLE-ABS (kangaroo mother care method) OR TITLE-ABS (kangaroo mother care) OR TITLE-ABS (kangaroo care ) OR TITLE-ABS (skin-to-skin contact) OR TITLE-ABS (skin to skin care)  AND  TITLE-ABS (oxygen) OR TITLE-ABS (vital signs) OR TITLE-ABS (heart rate) OR TITLE-ABS (respiratory rate) OR TITLE-ABS (brain) OR TITLE-ABS (cerebral perfusion) OR TITLE-ABS (cerebral saturation) OR TITLE-ABS (oxygen saturation) OR TITLE-ABS (cardiorrespiratory stability) OR TITLE-ABS (hemodynamic monitoring) OR TITLE-ABS (physiological stability)  AND  TITLE-ABS (premature infant) OR TITLE-ABS (extremely premature infant) OR TITLE-ABS (neonate) OR TITLE-ABS (infant) OR TITLE-ABS (newborn) OR TITLE-ABS (preterm) |
